# Supplementary material for: De-Suppression of Mesenchymal Cell Identities and Variable Phenotypic Outcomes Associated with Knockout of Bbs1
Source: MDPI journal article supplement (doi:10.3390/cells12222662), 2023-11-20
Supplement: s1 [file s1]

Supplementary Figure S7.

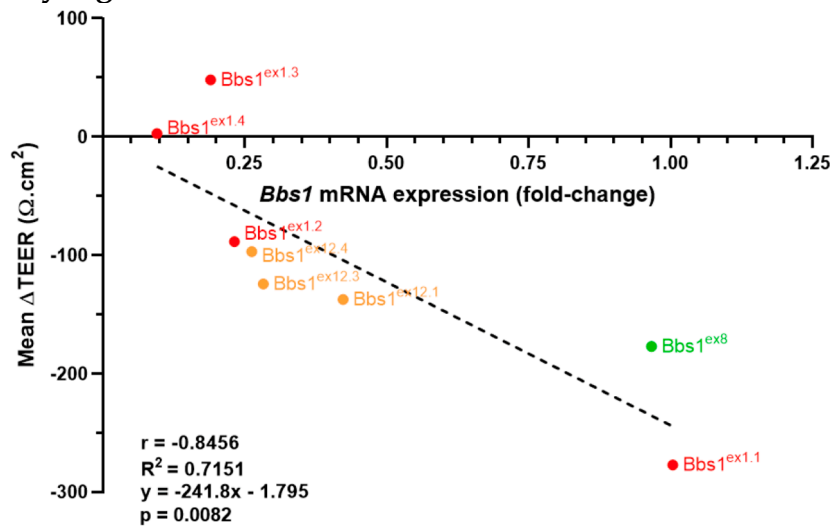

Correlation between *Bbs1* mRNA level and  $\Delta$ TEER in eight *Bbs1*<sup>-/-</sup> clones including *Bbs1*<sup>ex12.1</sup> and *Bbs1*<sup>ex12.4</sup>. There was a strong, negative correlation ( $r = -0.8456$ ) that was statistically significant ( $p=0.0082$ ). Points fit the model of linear regression well ( $R^2 = 0.7151$ ). Each coloured point represents a single *Bbs1*<sup>-/-</sup> clone, which are labelled and coloured based on the sgRNA with which they were generated (red= sgRNA-1; green= sgRNA-8; orange= sgRNA-12).
